# Supplementary material for: Systematic review and mixed treatment comparison: dressings to heal diabetic foot ulcers
Source: PubMed Central journal article supplement (PMC3369130; doi:10.1007/s00125-012-2558-5), 2012-04-29
Supplement: 125_2012_2558_MOESM1_ESM.pdf [file 125_2012_2558_MOESM1_ESM.pdf]

**ESM Table 1**

|                                      |                                                                                                                                                                                                                                                                                                                                                                                                                                                                                                                                                                                                                                                                                                                                                                                                                                                                                                                                                                                                                                                                                                                                                                                                                                                                                                                                                                                                                                                                                                                                                                                                                                                                                                                                                                                               |
|--------------------------------------|-----------------------------------------------------------------------------------------------------------------------------------------------------------------------------------------------------------------------------------------------------------------------------------------------------------------------------------------------------------------------------------------------------------------------------------------------------------------------------------------------------------------------------------------------------------------------------------------------------------------------------------------------------------------------------------------------------------------------------------------------------------------------------------------------------------------------------------------------------------------------------------------------------------------------------------------------------------------------------------------------------------------------------------------------------------------------------------------------------------------------------------------------------------------------------------------------------------------------------------------------------------------------------------------------------------------------------------------------------------------------------------------------------------------------------------------------------------------------------------------------------------------------------------------------------------------------------------------------------------------------------------------------------------------------------------------------------------------------------------------------------------------------------------------------|
| <p>Basic wound contact dressings</p> | <p><b>Low-adherence dressings and wound contact materials:</b> usually cotton pads which are placed directly in contact with the wound. They can be either non-medicated (e.g. paraffin gauze dressing) or medicated (e.g. containing povidone iodine or chlorhexidine).</p> <p><b>Absorbent dressings:</b> applied directly to the wound and may be used as secondary absorbent layers in the management of heavily exuding wounds.</p>                                                                                                                                                                                                                                                                                                                                                                                                                                                                                                                                                                                                                                                                                                                                                                                                                                                                                                                                                                                                                                                                                                                                                                                                                                                                                                                                                      |
| <p>Advanced wound dressings</p>      | <p><b>Alginate dressings:</b> highly absorbent and come in the form of calcium alginate or calcium sodium alginate and can be combined with collagen. The alginate forms a gel when in contact with the wound surface which can be lifted off with dressing removal or rinsed away with sterile saline.</p> <p><b>Hydrogel dressings:</b> consist of a starch polymer and up to 96% water. These dressings can absorb wound exudate or rehydrate a wound depending on the wound moisture levels. They are supplied in either flat sheets, an amorphous hydrogel or as beads.</p> <p><b>Films - permeable film and membrane dressings:</b> permeable to water vapour and oxygen but not to water or microorganisms.</p> <p><b>Soft polymer dressings:</b> dressings composed of a soft silicone polymer held in a non-adherent layer. They are moderately absorbent.</p> <p><b>Hydrocolloid dressings:</b> usually composed of an absorbent hydrocolloid matrix on a vapour-permeable film or foam backing.</p> <p><b>Fibrous hydrocolloid dressing:</b> Fibrous hydrocolloids have been developed which resemble alginates and are not occlusive.</p> <p><b>Hydrocolloid-matrix dressing:</b> Described in the BNF as a polyurethane matrix with absorbent particles and waterproof polyurethane film.</p> <p><b>Foam dressings:</b> contain hydrophilic polyurethane foam and are designed to absorb wound exudate and maintain moist wound surface.</p> <p><b>Capillary-action dressings:</b> consist of an absorbent core of hydrophilic fibres held between two low-adherent contact layers.</p> <p><b>Odour-absorbent dressings:</b> dressings that contain charcoal and are used to absorb wound odour. Can be used in conjunction with a secondary dressing to improve absorbency.</p> |
| <p>Anti-microbial dressings</p>      | <p><b>Iodine-impregnated dressings:</b> release free iodine when exposed to wound exudate, which is thought to act as a wound antiseptic.</p> <p><b>Silver-impregnated dressings:</b> used to treat infected wounds as silver ions are thought to have antimicrobial properties. Silver versions of most dressing types are available (e.g. silver foam, silver hydrocolloid etc).</p> <p><b>Other antimicrobial dressings:</b> these dressings are composed of a gauze or low-adherent dressing impregnated with an ointment thought to have antimicrobial properties.</p>                                                                                                                                                                                                                                                                                                                                                                                                                                                                                                                                                                                                                                                                                                                                                                                                                                                                                                                                                                                                                                                                                                                                                                                                                   |
| <p>Specialist dressings</p>          | <p><b>Protease-modulating matrix dressings:</b> are proposed to alter the activity of proteolytic enzymes in chronic wounds.</p>                                                                                                                                                                                                                                                                                                                                                                                                                                                                                                                                                                                                                                                                                                                                                                                                                                                                                                                                                                                                                                                                                                                                                                                                                                                                                                                                                                                                                                                                                                                                                                                                                                                              |

**ESM Table 1** Overview of common wound dressings based on British National Formulary categories.<sup>1</sup>

1. British Medical Association and Royal Pharmaceutical Society of Great Britain (2010). British National Formulary, Sept 2010;60, Appendix 8:Wound management Products and Elastic Hosiery. Available from [bnf.org.uk/bnf/bnf/current/104946.htm](http://bnf.org.uk/bnf/bnf/current/104946.htm), accessed
