# Supplementary material for: Systematic review and mixed treatment comparison: dressings to heal diabetic foot ulcers
Source: PubMed Central journal article supplement (PMC3369130; doi:10.1007/s00125-012-2558-5), 2012-04-29
Supplement: 125_2012_2558_MOESM3_ESM.pdf [file 125_2012_2558_MOESM3_ESM.pdf]

ESM Table 3

| Study         | Duration of follow-up (weeks) | Interventions evaluated (No. participants)        | Number healed (%) <sup>b</sup>   | Inclusion criteria                                                                                                                                                                                                                                                                                                                                                                                                                   | Mean Age in years (SD where reported, otherwise range where reported) | Mean Ulcer duration in days (SD where reported), unless stated | Mean Ulcer size in cm <sup>2</sup> (SD where reported) unless stated | Risk of Bias assessment (1) Generation of randomisation sequence (2) Allocation concealment (3) Blinded outcome assessment | Funding    |
|---------------|-------------------------------|---------------------------------------------------|----------------------------------|--------------------------------------------------------------------------------------------------------------------------------------------------------------------------------------------------------------------------------------------------------------------------------------------------------------------------------------------------------------------------------------------------------------------------------------|-----------------------------------------------------------------------|----------------------------------------------------------------|----------------------------------------------------------------------|----------------------------------------------------------------------------------------------------------------------------|------------|
| Ahroni 1993   | 4 weeks                       | Dry gauze (19)<br>Alginate (20)                   | 7 (37)<br>5 (25)                 | Patients with diabetic foot ulcers that penetrated the epidermis but did not significantly involve joint spaces, tendons or bone                                                                                                                                                                                                                                                                                                     | 65.4 (9.3)<br>61.2 (11.0)                                             | 74.9 (130.4)<br>132.9 (320.6)                                  | 166.7 mm <sup>2</sup> (211.1)<br>193.2 mm <sup>2</sup> (346.4)       | (1) Unclear<br>(2) Unclear<br>(3) High risk                                                                                | Commercial |
| Donaghue 1998 | 8 weeks                       | Saline-moistened gauze (25)<br>Alginate (50)      | 9 (36)<br>24 (48)                | Diabetic patients who were treated for foot ulceration of at least 21 years of age, adequate nutritional intake, as indicated by a serum albumin of > 2.5 grams/dl; adequate blood flow to the lower extremities, as indicated by palpable pulse and/or normal non-invasive tests; and foot ulceration of at least 1 cm <sup>2</sup> in size after initial debridement. No evidence of osteomyelitis, or clinical signs of infection | 60 (33-79)<br>59 (30-81)                                              | 225 (104)<br>146 (73)                                          | 2.99 (0.62)<br>2.60 (0.50)                                           | (1) Unclear<br>(2) Unclear<br>(3) High risk                                                                                | Commercial |
| Blackman 1994 | 8 weeks                       | Wet-to-dry saline gauze (7)<br>Foam (11)          | 0.5 (0) <sup>a</sup><br>3.5 (27) | Diabetic patients (type 1 and 2) with foot ulcers free of hard eschar. Wagner Grade: 1 or 2                                                                                                                                                                                                                                                                                                                                          | 51 (4.0)<br>59 (5.0)                                                  | 28.6<br>25.7                                                   | 1.81 (0.75)<br>2.67 (1.20)                                           | (1) Unclear<br>(2) Unclear<br>(3) Unclear                                                                                  | Commercial |
| Mazzone 1993  | 8 weeks                       | Wet-to-dry saline gauze dressing (8)<br>Foam (11) | 2 (25)<br>7 (64)                 | Diabetic foot ulcer                                                                                                                                                                                                                                                                                                                                                                                                                  | Not reported                                                          | Not reported                                                   | Not reported                                                         | (1) Unclear<br>(2) Unclear<br>(3) Unclear                                                                                  | Commercial |
| Roberts 2001  | 13 weeks                      | Saline-soaked low adherent (16)<br>Foam (14)      | 4 (25)<br>6 (43)                 | Type 1 diabetes with neuropathic ulcer. ABPI >0.8                                                                                                                                                                                                                                                                                                                                                                                    | Not reported                                                          | Not reported                                                   | Median = 144.5mm <sup>2</sup><br>Median = 114.5mm <sup>2</sup>       | (1) Unclear<br>(2) Unclear<br>(3) Unclear                                                                                  | Commercial |

|                    |                      |                                                                                       |                               |                                                                                                                                                                                                                                                                                                                                                                                                                                                                                                                   |                                           |                                    |                                                                                                                                                                                                                                                                                                                                            |                                              |                |
|--------------------|----------------------|---------------------------------------------------------------------------------------|-------------------------------|-------------------------------------------------------------------------------------------------------------------------------------------------------------------------------------------------------------------------------------------------------------------------------------------------------------------------------------------------------------------------------------------------------------------------------------------------------------------------------------------------------------------|-------------------------------------------|------------------------------------|--------------------------------------------------------------------------------------------------------------------------------------------------------------------------------------------------------------------------------------------------------------------------------------------------------------------------------------------|----------------------------------------------|----------------|
| Jeffcoate<br>2009  | 24<br>weeks          | Low adherence (106)<br>Hydrocolloid<br>(fibrous) (103)<br>Iodine-impregnated<br>(108) | 41 (39)<br>46 (45)<br>48 (44) | Patients with type 1 or 2<br>diabetes, aged 18 years or<br>more having a foot ulcer<br>present for at least 6<br>weeks. Ulcer cross-<br>sectional area of between<br>25 and 2500 mm <sup>2</sup> . Those<br>with an ankle brachial<br>pressure index of more<br>than 0.7 or toe systolic<br>pressure more than 30<br>mmHg.<br>No ulcer on either foot<br>extending to tendon,<br>periosteum or bone. No<br>infection of the bone or<br>soft tissue infection<br>requiring treatment with<br>systemic antibiotics. | 61.9 (12.8)<br>58.8 (13.2)<br>59.5 (11.5) |                                    | 25-100mm <sup>2</sup> : 50; 53; 48<br>101-250mm <sup>2</sup> :34; 36; 34<br>2501-2500mm <sup>2</sup> : 22;16;<br>24<br><br><i>Data categorised into<br/>three groups: (1) 25-100<br/>mm<sup>2</sup>; (2) range 101-250<br/>mm<sup>2</sup> and (3) range 251-<br/>2500 mm<sup>2</sup>. Reported as<br/>n(%) per category per<br/>group.</i> | (1) Low risk<br>(2) Low risk<br>(3) Low risk | Non-commercial |
| Piaggese<br>2001   | (Max<br>350<br>days) | Saline-moistened<br>gauze (10)<br>Hydrocolloid<br>(fibrous) (10)                      | 10 (100)<br>9 (90)            | Diabetic patients (type 1<br>or type 2) for over 5 years,<br>between age 18 to 75<br>years, foot ulcer more<br>than 3 weeks, >1 cm wide<br>and 1 cm deep, good<br>peripheral blood supply<br>(palpable peripheral<br>pulses or ABPI >0.9). No<br>active infection.                                                                                                                                                                                                                                                | 61.3 (7.5)<br>63.1(4.6)                   | 5.9 (1.3) weeks<br>6.8 (2.6) weeks | Ulcer vol : 19.2 (6.4) cm <sup>3</sup><br>Ulcer vol : 22.6 (8.4 ) cm <sup>3</sup>                                                                                                                                                                                                                                                          | (1) Low risk<br>(2) Unclear<br>(3) Unclear   | Non-commercial |
| Jensen 1998        | 16<br>weeks          | Saline-moistened<br>gauze (17)<br>Hydrogel (14)                                       | 6 (35)<br>11 (79)             | No signs of infection in<br>the ulcer or the peri-<br>wound tissue. Diabetic<br>foot ulcer measuring at<br>least 1cm diameter,<br>Diabetic patients with foot<br>ulcers of Wagner grade 2<br>defined as full thickness<br>into subcutaneous tissue<br>but not involving tendon,<br>joint capsule or bone,<br>having palpable pulse and<br>willingness to comply to<br>the treatment.                                                                                                                              | Not reported                              | Not reported                       | Not reported                                                                                                                                                                                                                                                                                                                               | (1) Unclear<br>(2) Unclear<br>(3) Unclear    | Commercial     |
| Vandeputte<br>1997 | 12<br>weeks          | Dry gauze (14)<br>Hydrogel (15)                                                       | 7 (50)<br>14 (93)             | Patients with diabetes and<br>a wound on the foot.<br>Necrotic and/or infected<br>wound were included.<br>Only patients receiving<br>systemic antibiotics were<br>excluded from the trial.                                                                                                                                                                                                                                                                                                                        | 65.3 (14.3)<br>62.6 (14.7)                | Not reported                       | Not reported                                                                                                                                                                                                                                                                                                                               | (1) Unclear<br>(2) Unclear<br>(3) High risk  | Not reported   |

|                  |          |                                                       |                    |                                                                                                                                                                                                                                                                                                                                                           |                            |                                                        |                                          |                                            |              |
|------------------|----------|-------------------------------------------------------|--------------------|-----------------------------------------------------------------------------------------------------------------------------------------------------------------------------------------------------------------------------------------------------------------------------------------------------------------------------------------------------------|----------------------------|--------------------------------------------------------|------------------------------------------|--------------------------------------------|--------------|
| D'Hemecourt 1998 | 20 weeks | Wet-to-moist saline gauze (68)<br>Hydrogel (70)       | 15 (22)<br>25 (36) | Patients of 19 years of age or older with type 1 or type 2 diabetes mellitus with at least one full thickness (stage 3 or 4), chronic diabetic foot ulcer present for at least 8 weeks prior to the study. A target area between 1.0 and 10 cm <sup>2</sup> was required. Ulcers with osteomyelitis affecting the area of the target ulcer were excluded. | Not reported               | 42.0 (42.0) weeks*<br>52.8 (60.9) weeks*<br>*n=24 only | 3.5 (3.53)<br>3.2 (2.75)                 | (1) Unclear<br>(2) Unclear<br>(3) Low risk | Not reported |
| Veves 2002       | 12 weeks | Saline-moistened gauze (138)<br>Protease-matrix (138) | 39 (28)<br>51 (37) | Diabetic patients above 18 years of age with foot ulcers of at least 30 days duration, Wagner grade 1 or 2 and area of at least 1 cm <sup>2</sup> . Patients had adequate circulation wound that was debrided of necrotic tissue at enrolment. No clinical signs of infection or a target wound that had exposed bone.                                    | 59 (37-83)<br>58 (23-85)   | Median;(range): 3 (1-144)<br>Median;(range): 3 (1-84)  | 3.1 (0.1-42.4)<br>2.5 (0.2-27.4)         | (1) Unclear<br>(2) Unclear<br>(3) Unclear  | Commercial   |
| Baker 1993       | 12 weeks | Alginate (10)<br>Foam (10)                            | 4 (40)<br>9 (90)   | Patients above 18 years of age with clean diabetic foot ulcers that were neuropathic in origin located on weight bearing areas of the foot. No necrotic, sloughy ulcers or peripheral vascular disease, no presence of infection in ulcerative foot.                                                                                                      | 54.1 (15.8)<br>58.9 (18.5) | 26.3 (49.2)<br>19.8 (21.9)                             | 0.82 (0.73)<br>0.89 (0.62)               | (1) Low risk<br>(2) Unclear<br>(3) Unclear | Not reported |
| Foster 1994      | 8 weeks  | Alginate (15)<br>Foam (15)                            | 8 (53)<br>9 (60)   | Patients above the age of 18 years with clean diabetic foot ulcers and were willing and able to comply with study protocol and without sloughy, necrotic or infected ulcer.                                                                                                                                                                               | 70<br>61                   | 170<br>107                                             | 79 mm <sup>2</sup><br>88 mm <sup>2</sup> | (1) Unclear<br>(2) Unclear<br>(3) Unclear  | Not reported |

|             |          |                                                     |                    |                                                                                                                                                                                                                                                                                                                                                                                                       |                             |                                    |                                                  |                                             |            |
|-------------|----------|-----------------------------------------------------|--------------------|-------------------------------------------------------------------------------------------------------------------------------------------------------------------------------------------------------------------------------------------------------------------------------------------------------------------------------------------------------------------------------------------------------|-----------------------------|------------------------------------|--------------------------------------------------|---------------------------------------------|------------|
| Jude 2007   | 8 weeks  | Alginate (67)<br>Silver hydrocolloid (fibrous) (67) | 15 (22)<br>21 (31) | Patients with type 1 or type 2 diabetes mellitus (HbA1c ≤ 12%), serum creatinine ≤ 200 mol/l diabetic foot ulcers classed as Wagner grade 1 or 2 and of neuropathic or neuro-ischaemic aetiology. All wounds > 1cm <sup>2</sup> in area. Adequate arterial perfusion as defined by ankle-to-brachial index > 0.8, great toe systolic blood pressure > 40 mmHg or forefoot TcPO <sub>2</sub> > 30 mmHg | 58.9 (12.6)<br>61.1 (11.4)  | 1.2 (2.1) years<br>1.4 (2.6) years | 3.1 (4.1)<br>4.2 (7.8)                           | (1) Low risk<br>(2) Unclear<br>(3) Unclear  | Commercial |
| Clever 1995 | 16 weeks | Foam (20)<br>Hydrocolloid-matrix (20)               | 14 (70)<br>16 (80) | Patients aged 18 to 80 years with a pure neuropathic superficial ulcer 1 to 5 cm in diameter and with no clinical and radiological signs of osteomyelitis or tendon involvement.                                                                                                                                                                                                                      | 53.2 (14.6)<br>58.9 (11.64) | 165 (318-68)<br>162.37 (325.55)    | 207.83 mm <sup>2</sup><br>205.09 mm <sup>2</sup> | (1) Unclear<br>(2) Unclear<br>(3) High risk | Commercial |

**ESM Table 3:** Summary of trial characteristics of included studies.

<sup>a</sup>0.5 added to group and healed values for this study to allow calculation of odds ratio.

<sup>b</sup>where proportion of ulcers healed data were presented we assumed that when randomised participants were not included in an analysis, their wound did not heal (that is they were considered in the denominator but not the numerator). Ankle brachial pressure index (ABPI). Standard deviation (SD).
