# Supplementary material for: Systematic review and mixed treatment comparison: dressings to heal diabetic foot ulcers
Source: PubMed Central journal article supplement (PMC3369130; doi:10.1007/s00125-012-2558-5), 2012-04-29
Supplement: 125_2012_2558_MOESM4_ESM.pdf [file 125_2012_2558_MOESM4_ESM.pdf]

ESM Table 4

|                             | Probability of being the best treatment choice in terms of healing (%) |                             |                             |                            |                            |                             |                                |                               |                           |                          |                           |
|-----------------------------|------------------------------------------------------------------------|-----------------------------|-----------------------------|----------------------------|----------------------------|-----------------------------|--------------------------------|-------------------------------|---------------------------|--------------------------|---------------------------|
|                             | Ahroni<br>1993<br>removed                                              | Donaghue<br>1998<br>removed | Blackman<br>1994<br>removed | Mazzone<br>1993<br>removed | Roberts<br>2001<br>removed | Piaggese<br>2001<br>removed | D'Hemecourt<br>1998<br>removed | Vandeputte<br>1997<br>removed | Jenson<br>1998<br>removed | Baker<br>1993<br>removed | Foster<br>1994<br>removed |
| Matrix hydrocolloid         | 71                                                                     | 66                          | 67                          | 67                         | 72                         | 70                          | 35                             | 73                            | 72                        | 63                       | 75                        |
| Hydrogel                    | 9                                                                      | 21                          | 17                          | 18                         | 10                         | 14                          | 62                             | 8                             | 9                         | 21                       | 6                         |
| Foam                        | 14                                                                     | 11                          | 12                          | 12                         | 16                         | 13                          | 2                              | 14                            | 15                        | 9                        | 18                        |
| Silver fibrous hydrocolloid | 6                                                                      | 2                           | 3                           | 3                          | 2                          | 3                           | 1                              | 3                             | 3                         | 7                        | 1                         |
| Basic wound contact layer   | 0                                                                      | 0                           | 0                           | 0                          | 0                          | 0                           | 0                              | 0                             | 0                         | 0                        | 0                         |
| Alginate                    | 0                                                                      | 0                           | 0                           | 0                          | 0                          | 0                           | 0                              | 0                             | 0                         | 0                        | 0                         |
| Fibrous hydrocolloid        | 0                                                                      | 0                           | 0                           | 0                          | 0                          | 0                           | 0                              | 0                             | 0                         | 0                        | 0                         |
| Impregnated-iodine          | 0                                                                      | 0                           | 0                           | 0                          | 0                          | 0                           | 0                              | 0                             | 0                         | 0                        | 0                         |
| Protease modulating         | 0                                                                      | 0                           | 0                           | 0                          | 0                          | 0                           | 0                              | 0                             | 0                         | 0                        | 0                         |

**ESM Table 4 Sensitivity analyses.** Table shows the probability that each treatment is the best in terms of healing diabetic foot ulcers when one trial (named in column) had been removed. Shaded cell highlights study with highest probability for each column.
